# Supplementary material
Source: publisher site journal article supplement (https://www.dovepress.com/article/518625)
Supplement: Supplementary file 1 [file 518625-Supplementary-Material.docx]

Supplementary Material

**Radiation-based multi-modal therapy combining with immunotherapy to develop a vaccine-like effective treatment for triple-negative breast cancer**

Mengyan Dai a,b*, Zuhong Tian b,d*, Fanyuan Xu b, Bang Yao b,e, Hongxia Liang a,b, Dongyan Li a,b, Jiangang Wang c, Junyan Rong b, Tianshuai Liu b, Haili Tang c#, Hongbing Lu b#, Wenli Zhang b#

Corresponding author: Wenli Zhang and Hongbing Lu

School of Biomedical Engineering, The Fourth Military Medical University, 169th Changle West Road, Xi’an, Shaanxi, 710032, China

Email (mandatory) : wenli1121@fmmu.edu.cn and luhb@fmmu.edu.cn

**a.** The College of Life Sciences, NorthWest University, 229th Taibai North Road, Xi'an City, 710069, China

**b.** School of Biomedical Engineering, Shaanxi Provincial Key Laboratory of Bioelectromagnetic Detection and Intelligent Perception, The Fourth Military Medical University, 169th Changle West Road, Xi’an, Shaanxi, 710032, China

**c.** Department of General Surgery, the Second Affiliated Hospital of the Fourth Military Medical University, Xi’an 710038, China

**d.** State Key Laboratory of Holistic Integrative Management of Gastrointestinal Cancers and Xijing Hospital of Digestive Diseases, Fourth Military Medical University, Xi'an, 710032, China

**e.** School of Materials Science and Engineering, Shaanxi University of Science and Technology, Xi’an, Shaanxi, 710021, China

Mengyan Dai a,b*
Zuhong Tian b,d*
*These authors contributed equally to this work


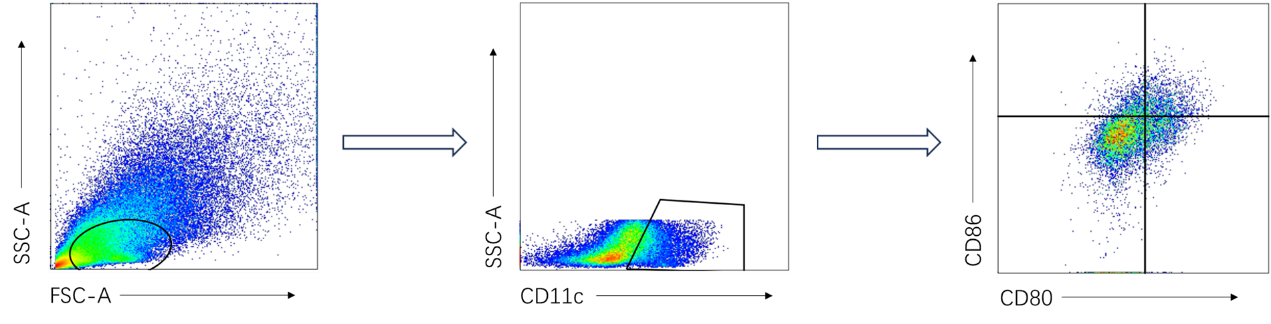


**Figure S1**. Lap-gate scheme for intratumoral mature dendritic cells.


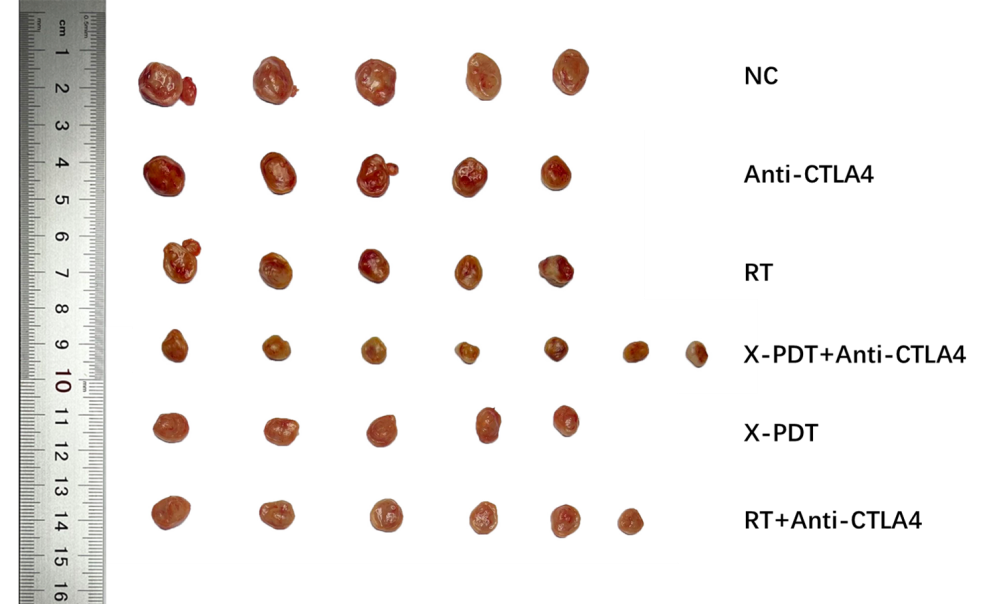


**Figure S2**. White light acquisition plots of isolated tumor tissue from each group dissected at the end of the experiment (n=8-10).


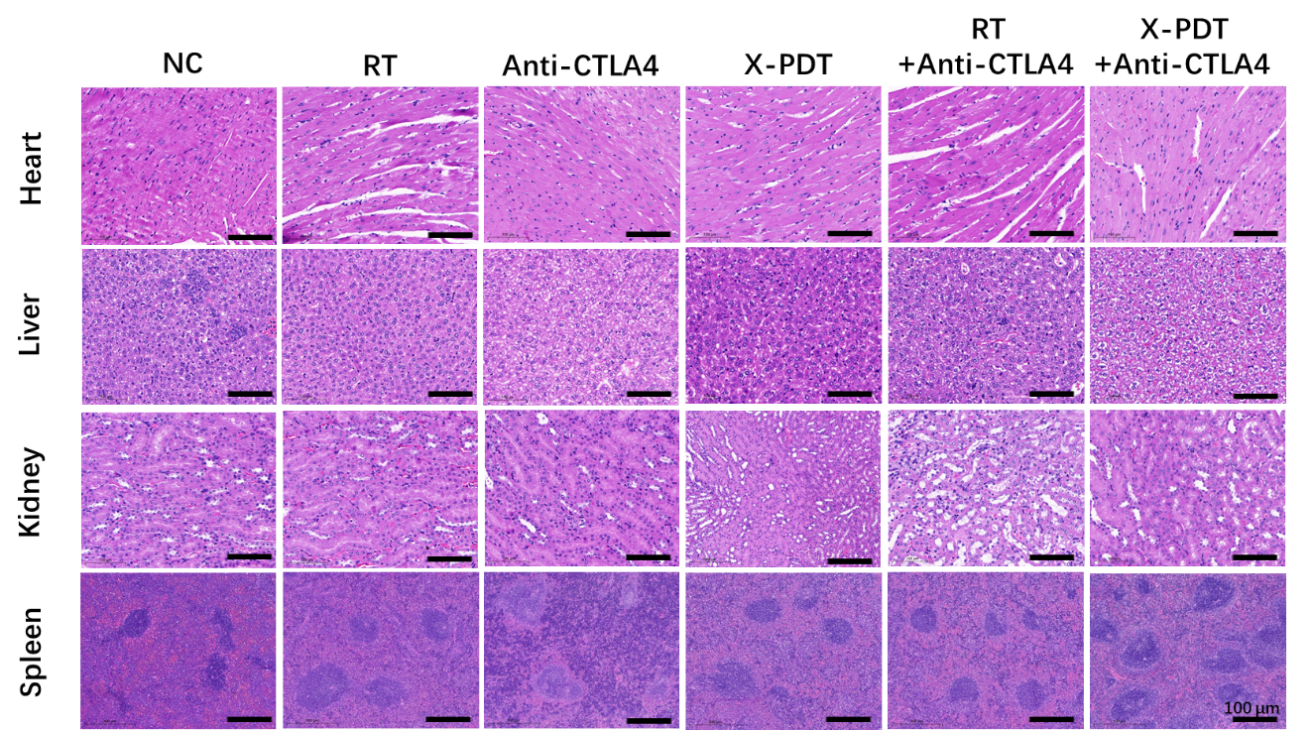


**Figure S3**. Representative H&E staining of major organs after different treatments (Scale bar: 100 μm).

**Figure S4**. Body weight of mice in each group during monitoring (n=8-10).


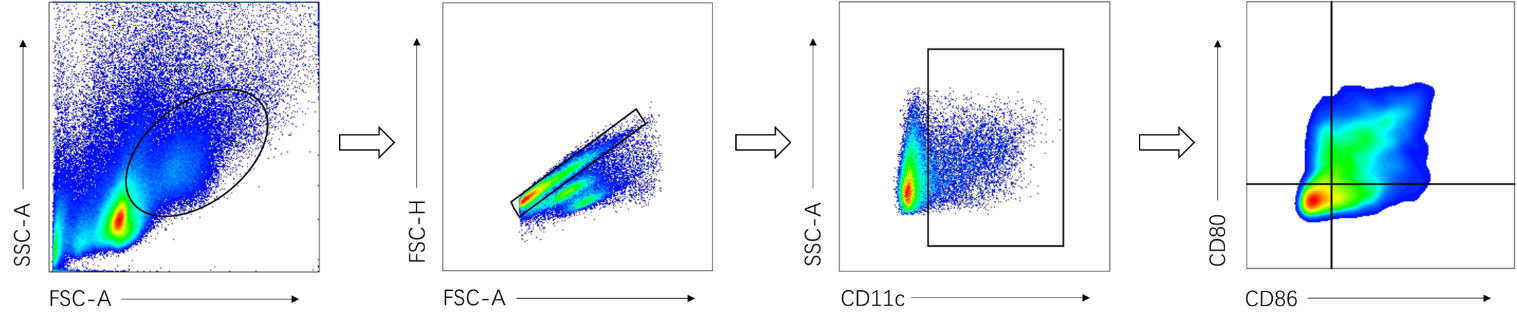


**Figure S5**. Lap-gate scheme for mature dendritic cells in tumor-draining lymph nodes.


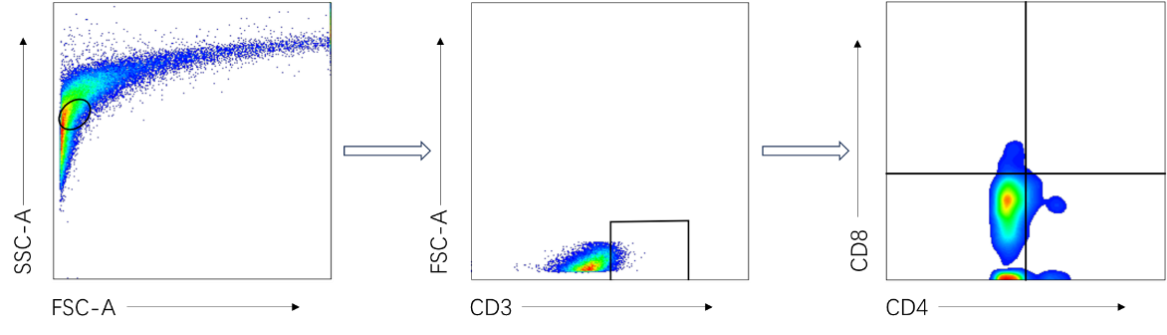


**Figure S6**. Lap-gate scheme for intratumorally infiltrating CD8+/CD4+ T cells.


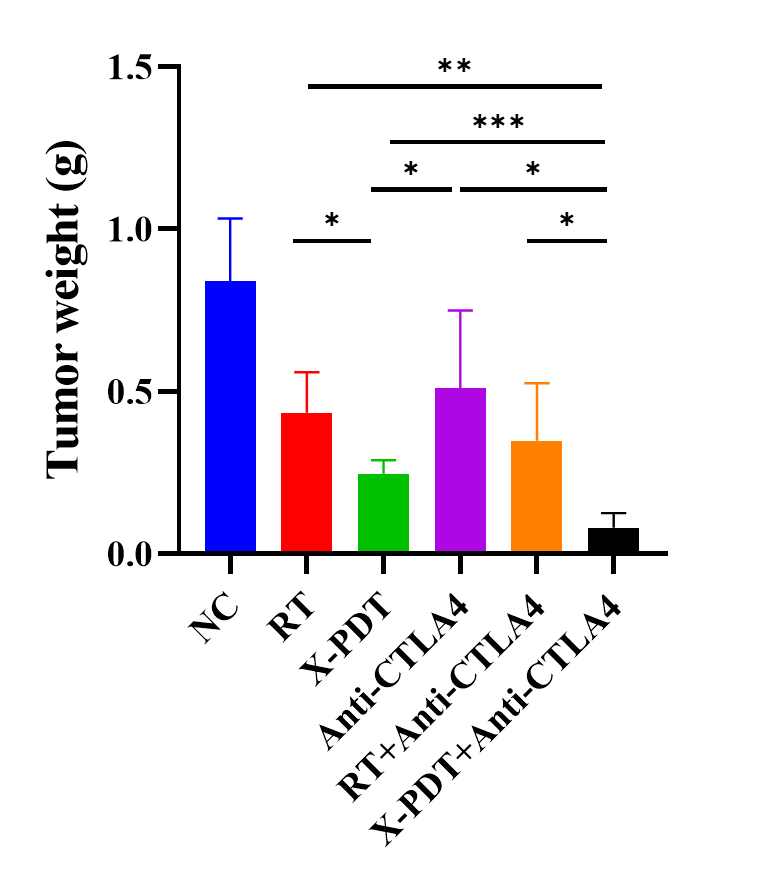


**Figure S7**. Tumor weights during monitoring of mice in each group of the long-term immune memory effect component (n=5 ;*, P＜0.05; **, P＜0.01; ***, P＜0.001).


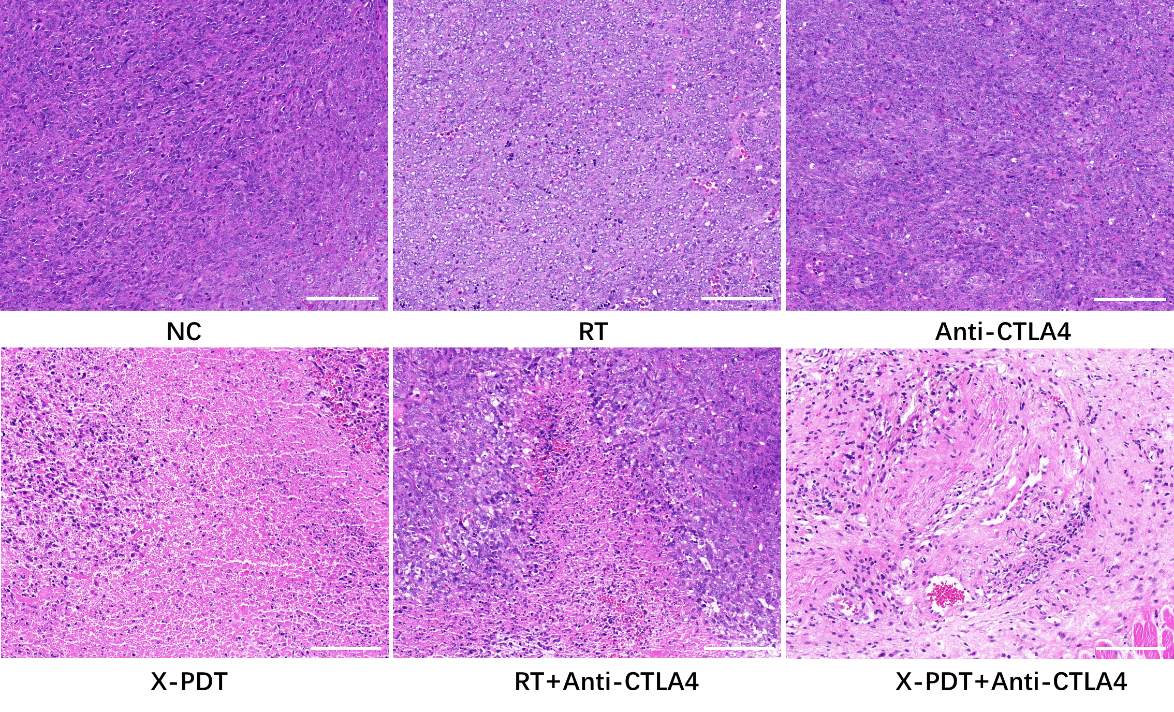


**Figure S8**. Recurrence tumor H&E staining images (scale bar: 100 μm).

**Figure S9**. Body weight during monitoring of mice in each group of the long-term immune memory effect component (n=5).

**
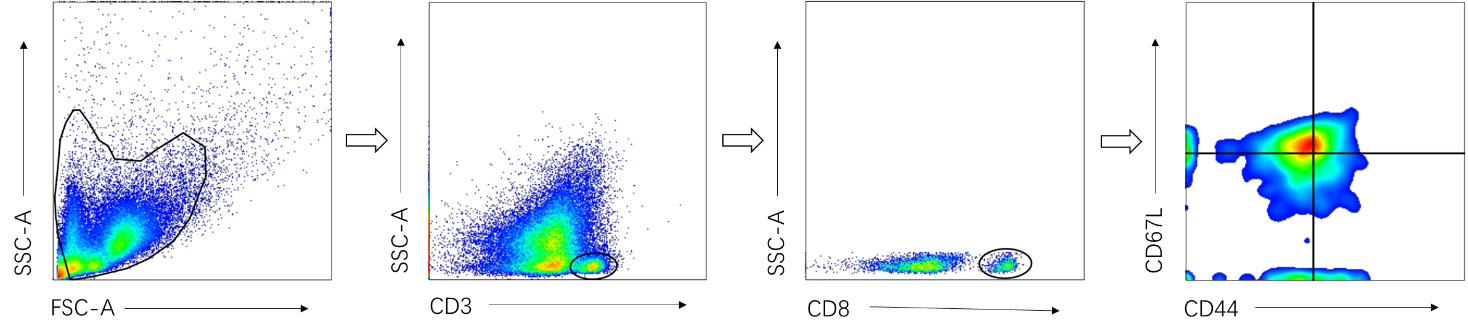
Figure S10**. Spleen Tem cells lap-gate scheme.

**Figure S11**. Survival curves for each group of mice during monitoring (n=8-10).
